# Supplementary material for: Unforeseen Effects of Supplementary Feeding: Ungulate Baiting Sites as Hotspots for Ground-Nest Predation
Source: PLoS One. 2014 Mar 5;9(3):e90740. doi: 10.1371/journal.pone.0090740 (PMC3944607; doi:10.1371/journal.pone.0090740)
Supplement: Table S1 — (XLSX) [file pone.0090740.s001.xlsx]

## Sheet: Hoja1
Area	Line	Feeding/Control site	No. days	Distance	Nest type	Predation
A	a	FS	6	18	tree base	0
A	a	FS	6	22	tree base	1
A	a	FS	6	26	under log	0
A	a	FS	6	39	under log	0
A	a	FS	6	60	tree base	0
A	a	FS	6	64	under log	0
A	a	FS	6	66	bush base	0
A	a	FS	6	70	tree base	0
A	a	FS	6	77	under log	0
A	a	FS	6	90	under log	0
A	a	FS	15	18	tree base	0
A	a	FS	15	22	tree base	1
A	a	FS	15	26	under log	0
A	a	FS	15	39	under log	1
A	a	FS	15	60	tree base	1
A	a	FS	15	64	under log	0
A	a	FS	15	66	bush base	0
A	a	FS	15	70	tree base	1
A	a	FS	15	77	under log	0
A	a	FS	15	90	under log	0
A	b	CS	6	3650	tree base	1
A	b	CS	6	3650	tree base	0
A	b	CS	6	3660	under log	1
A	b	CS	6	3660	under log	0
A	b	CS	6	3670	under log	1
A	b	CS	6	3680	tree base	1
A	b	CS	6	3690	tree base	0
A	b	CS	6	3730	under log	0
A	b	CS	6	3750	tree base	0
A	b	CS	6	3770	tree base	0
A	b	CS	15	3650	tree base	1
A	b	CS	15	3650	tree base	1
A	b	CS	15	3660	under log	1
A	b	CS	15	3660	under log	0
A	b	CS	15	3670	under log	1
A	b	CS	15	3680	tree base	1
A	b	CS	15	3690	tree base	1
A	b	CS	15	3730	under log	1
A	b	CS	15	3750	tree base	1
A	b	CS	15	3770	tree base	1
B	c	FS	6	15	tree base	1
B	c	FS	6	30	under log	0
B	c	FS	6	40	tree base	1
B	c	FS	6	40	tree base	0
B	c	FS	6	50	under log	0
B	c	FS	6	59	under log	0
B	c	FS	6	60	tree base	0
B	c	FS	6	70	tree base	0
B	c	FS	6	78	tree base	0
B	c	FS	6	95	tree base	0
B	c	FS	15	15	tree base	1
B	c	FS	15	30	under log	0
B	c	FS	15	40	tree base	1
B	c	FS	15	40	tree base	1
B	c	FS	15	50	under log	0
B	c	FS	15	59	under log	0
B	c	FS	15	60	tree base	0
B	c	FS	15	70	tree base	0
B	c	FS	15	78	tree base	0
B	c	FS	15	95	tree base	0
B	d	CS	6	3450	tree base	0
B	d	CS	6	3470	under log	0
B	d	CS	6	3490	under log	0
B	d	CS	6	3510	under log	0
B	d	CS	6	3520	tree base	0
B	d	CS	6	3530	under log	0
B	d	CS	6	3550	under log	0
B	d	CS	6	3556	tree base	0
B	d	CS	6	3570	under log	0
B	d	CS	6	3580	under log	0
B	d	CS	15	3450	tree base	0
B	d	CS	15	3470	under log	0
B	d	CS	15	3490	under log	0
B	d	CS	15	3510	under log	0
B	d	CS	15	3520	tree base	0
B	d	CS	15	3530	under log	0
B	d	CS	15	3550	under log	0
B	d	CS	15	3556	tree base	0
B	d	CS	15	3570	under log	0
B	d	CS	15	3580	under log	0
C	e	FS	6	26	under log	1
C	e	FS	6	30	tree base	0
C	e	FS	6	49	under log	0
C	e	FS	6	51	under log	0
C	e	FS	6	67	tree base	0
C	e	FS	6	73	under log	1
C	e	FS	6	74	under log	0
C	e	FS	6	79	tree base	0
C	e	FS	6	94	under log	0
C	e	FS	6	100	tree base	0
C	e	FS	15	26	under log	1
C	e	FS	15	30	tree base	0
C	e	FS	15	49	under log	0
C	e	FS	15	51	under log	1
C	e	FS	15	67	tree base	1
C	e	FS	15	73	under log	1
C	e	FS	15	74	under log	0
C	e	FS	15	79	tree base	0
C	e	FS	15	94	under log	0
C	e	FS	15	100	tree base	0
C	f	CS	6	1660	under log	0
C	f	CS	6	1660	under log	0
C	f	CS	6	1670	tree base	0
C	f	CS	6	1700	under log	0
C	f	CS	6	1730	tree base	0
C	f	CS	6	1730	under log	0
C	f	CS	6	1760	tree base	1
C	f	CS	6	1770	tree base	0
C	f	CS	6	1780	under log	0
C	f	CS	6	1800	tree base	0
C	f	CS	15	1660	under log	0
C	f	CS	15	1660	under log	0
C	f	CS	15	1670	tree base	1
C	f	CS	15	1700	under log	0
C	f	CS	15	1730	tree base	0
C	f	CS	15	1730	under log	0
C	f	CS	15	1760	tree base	1
C	f	CS	15	1770	tree base	1
C	f	CS	15	1780	under log	0
C	f	CS	15	1800	tree base	0
D	g	FS	6	16	under log	1
D	g	FS	6	37	under log	1
D	g	FS	6	51	under log	1
D	g	FS	6	51	tree base	1
D	g	FS	6	67	under log	1
D	g	FS	6	78	under log	1
D	g	FS	6	85	tree base	1
D	g	FS	6	87	tree base	0
D	g	FS	6	92	tree base	1
D	g	FS	6	108	tree base	0
D	g	FS	15	16	under log	1
D	g	FS	15	37	under log	1
D	g	FS	15	51	under log	1
D	g	FS	15	51	tree base	1
D	g	FS	15	67	under log	1
D	g	FS	15	78	under log	1
D	g	FS	15	85	tree base	1
D	g	FS	15	87	tree base	1
D	g	FS	15	92	tree base	1
D	g	FS	15	108	tree base	0
D	h	CS	6	2260	under log	0
D	h	CS	6	2300	tree base	0
D	h	CS	6	2350	tree base	1
D	h	CS	6	2350	under log	0
D	h	CS	6	2360	tree base	0
D	h	CS	6	2370	under log	0
D	h	CS	6	2390	stump	1
D	h	CS	6	2410	under log	1
D	h	CS	6	2450	tree base	1
D	h	CS	6	2470	under log	0
D	h	CS	15	2260	under log	0
D	h	CS	15	2300	tree base	0
D	h	CS	15	2350	tree base	1
D	h	CS	15	2350	under log	0
D	h	CS	15	2360	tree base	1
D	h	CS	15	2370	under log	0
D	h	CS	15	2390	stump	1
D	h	CS	15	2410	under log	1
D	h	CS	15	2450	tree base	1
D	h	CS	15	2470	under log	0
E	i	FS	6	9	tree base	1
E	i	FS	6	25	tree base	1
E	i	FS	6	36	under log	1
E	i	FS	6	39	under log	1
E	i	FS	6	49	under log	1
E	i	FS	6	64	tree base	1
E	i	FS	6	69	under log	1
E	i	FS	6	86	tree base	1
E	i	FS	6	98	under log	1
E	i	FS	6	103	tree base	0
E	i	FS	15	9	tree base	1
E	i	FS	15	25	tree base	1
E	i	FS	15	36	under log	1
E	i	FS	15	39	under log	1
E	i	FS	15	49	under log	1
E	i	FS	15	64	tree base	1
E	i	FS	15	69	under log	1
E	i	FS	15	86	tree base	1
E	i	FS	15	98	under log	1
E	i	FS	15	103	tree base	0
E	j	CS	6	1890	under log	0
E	j	CS	6	1920	tree base	0
E	j	CS	6	1930	tree base	0
E	j	CS	6	1950	tree base	0
E	j	CS	6	1960	under log	0
E	j	CS	6	1970	under log	0
E	j	CS	6	1980	under log	1
E	j	CS	6	1990	under log	0
E	j	CS	6	2000	tree base	0
E	j	CS	6	2010	tree base	0
E	j	CS	15	1890	under log	0
E	j	CS	15	1920	tree base	0
E	j	CS	15	1930	tree base	0
E	j	CS	15	1950	tree base	0
E	j	CS	15	1960	under log	0
E	j	CS	15	1970	under log	0
E	j	CS	15	1980	under log	1
E	j	CS	15	1990	under log	0
E	j	CS	15	2000	tree base	0
E	j	CS	15	2010	tree base	0
F	k	FS	6	9	tree base	1
F	k	FS	6	24	tree base	1
F	k	FS	6	28	under log	1
F	k	FS	6	44	tree base	1
F	k	FS	6	46	under log	1
F	k	FS	6	56	under log	1
F	k	FS	6	58	tree base	1
F	k	FS	6	76	under log	1
F	k	FS	6	92	under log	0
F	k	FS	6	108	tree base	1
F	k	FS	15	9	tree base	1
F	k	FS	15	24	tree base	1
F	k	FS	15	28	under log	1
F	k	FS	15	44	tree base	1
F	k	FS	15	46	under log	1
F	k	FS	15	56	under log	1
F	k	FS	15	58	tree base	1
F	k	FS	15	76	under log	1
F	k	FS	15	92	under log	1
F	k	FS	15	108	tree base	1
F	l	CS	6	2690	tree base	1
F	l	CS	6	2730	tree base	0
F	l	CS	6	2740	under log	0
F	l	CS	6	2770	tree base	0
F	l	CS	6	2790	tree base	0
F	l	CS	6	2830	under log	1
F	l	CS	6	2870	tree base	0
F	l	CS	6	2890	tree base	0
F	l	CS	6	2910	tree base	0
F	l	CS	6	2960	under log	0
F	l	CS	15	2690	tree base	1
F	l	CS	15	2730	tree base	0
F	l	CS	15	2740	under log	0
F	l	CS	15	2770	tree base	0
F	l	CS	15	2790	tree base	0
F	l	CS	15	2830	under log	1
F	l	CS	15	2870	tree base	0
F	l	CS	15	2890	tree base	0
F	l	CS	15	2910	tree base	1
F	l	CS	15	2960	under log	0
